# Supplementary material
Source: PubMed Central journal article supplement (PMC4129449)
Supplement: NIHMS610666-supplement-Supplement.pdf [file NIHMS610666-supplement-Supplement.pdf]

Supplementary Material

## AIDS-related mycoses: the way forward

Gordon D. Brown<sup>1,2\*</sup>, Graeme Meintjes<sup>1</sup>, Jay K. Kolls<sup>3</sup>, Clive Gray<sup>1</sup>, William Horsnell<sup>1</sup> and the Working Group from the EMBO-AIDS Related Mycoses Workshop<sup>†</sup>

<sup>1</sup>Institute of Infectious Disease and Molecular Medicine, University of Cape Town, Observatory, 7925, Cape Town, South Africa.

<sup>2</sup>Aberdeen Fungal Group, University of Aberdeen, Institute of Medical Sciences, Foresterhill, Aberdeen, AB25 2ZD, UK

<sup>3</sup>Department of Pediatrics, University of Pittsburgh School of Medicine, Pittsburgh, PA 15224, USA

<sup>†</sup>For a full list of authors please see the Supplementary Material Table S1

Corresponding author: Brown, G.D (gordon.brown@abdn.ac.uk)

Table S1. Working group from the EMBO-AIDS Related Mycoses Workshop

| First name | Surname         | Institution                                       |
|------------|-----------------|---------------------------------------------------|
| Beatrice   | Achan           | University of Aberdeen                            |
| Gottfried  | Alber           | University of Leipzig                             |
| Maria      | Aloisi          | Msd Pty Ltd                                       |
| Darius     | Armstrong-James | Imperial College London                           |
| Mathew     | Beale           | St George's University of London                  |
| Tihana     | Bicanic         | St. George's University of London                 |
| John       | Black           | University Of Cape Town                           |
| Paul       | Bohjanen        | University of Minnesota                           |
| Angela     | Botes           | Stellenbosch University                           |
| David R.   | Boulware        | University of Minnesota                           |
| Gordon     | Brown           | University of Aberdeen                            |
| Rubina     | Bunjun          | University of Cape Town                           |
| William    | Carr            | Medgar Evers College, City University Of New York |
| Arturo     | Casadevall      | Albert Einstein College of Medicine               |
| Christina  | Chang           | Monash University                                 |
| Ernest     | Chivero         | University of Iowa, Carver College of Medicine    |
| Craig      | Corcoran        | Ampath                                            |
| Anna       | Cross           | Desmond Tutu HIV Foundation                       |
| Halima     | Dawood          | Greys Hospital                                    |
| Jeremy     | Day             | Wellcome Trust Major Overseas Programme Vietnam   |
| Flavia     | De Bernardis    | Istituto Superiore Di Sanita'                     |
| Veronique  | De Jager        | Kheth'Impilo                                      |
| Louis      | De Repentigny   | University of Montreal                            |
| David      | Denning         | University of Manchester                          |
| Maria      | Eschke          | University of Leipzig                             |
| Malcolm    | Finkelman       | Associates of Cape Cod, Inc.                      |
| Nelesh     | Govender        | National Institute for Communicable Diseases      |
| Neil       | Gow             | University of Aberdeen                            |
| Lisa       | Graham          | University of Cape Town                           |
| Clive      | Gray            | University of Cape Town                           |
| Ronaldo    | Gryschek        | University of Sao Paulo Medical School            |

|               |                  |                                                              |
|---------------|------------------|--------------------------------------------------------------|
| Kenneth       | Hammond-Aryee    | Stellenbosch University                                      |
| Tom           | Harrison         | St. George's University of London                            |
| Neil          | Heard            | Alberta Health                                               |
| Melanie       | Hill             | Manguzi Hospital                                             |
| J. Claire     | Hoving           | University of Cape Town                                      |
| Edward        | Janoff           | University of Colorado at Denver                             |
| Joseph        | Jarvis           | London School of Hygiene and Tropical Medicine               |
| Sekeleghe     | Kayuni           | Masm Medi Clinics Ltd                                        |
| Karin         | King             | Cepheid                                                      |
| Jay           | Kolls            | University of Pittsburgh School of Medicine                  |
| Bart-Jan      | Kullberg         | Radboud University Nijmegen Medical Center                   |
| David G.      | Lalloo           | Liverpool School of Tropical Medicine                        |
| Emilio        | Letang           | Swiss Tropical And Public Health Institute                   |
| Stuart        | Levitz           | University of Massachusetts Medical School                   |
| Andrew        | Limper           | Mayo Clinic College of Medicine                              |
| Nicky         | Longley          | University of Cape Town, St George's University of London    |
| Tendai Rodney | Machiridza       | University of Zimbabwe.                                      |
| Yesholata     | Mahabeer         | Nhls. Academic Complex. Durban & Univ. of Kwazulu Natal      |
| Neil          | Martinsons       | Perinatal HIV Research Unit                                  |
| Graeme        | Meintjes         | University of Cape Town                                      |
| Susan         | Meiring          | National Institute For Communicable Diseases                 |
| David         | Meya             | Infectious Disease Institute, Makerere University            |
| Robert        | Miller           | University College London                                    |
| Sile          | Molloy           | St George's University of London                             |
| Lynn          | Morris           | National Institute for Communicable Diseases                 |
| Liliane       | Mukaremera       | University of Aberdeen                                       |
| Abdu K.       | Musubire         | Infectious Disease Institute, Makerere University            |
| Conrad        | Muzoora          | Mbarara University of Science and Technology                 |
| Amy           | Nair             | University of Cape Town                                      |
| Justine       | Nakiwala Kimbowa | University of Cape Town                                      |
| Mihai         | Netea            | Radboud University Nijmegen Medical Center                   |
| Kirsten       | Nielsen          | University of Minnesota                                      |
| Jennifer      | O'hern           | University of Cape Town                                      |
| Samuel        | Okurut           | Makerere University                                          |
| Arifa         | Parker           | Stellenbosch University                                      |
| Tom           | Patterson        | The University of Texas Health Science Center at San Antonio |
| Grace         | Pennap           | Nasarawa State University Keffi                              |
| John          | Perfect          | Duke University Medical Center                               |
| Chrisna       | Prinsloo         | Hain Lifescience Sa                                          |
| Joshua        | Rhein            | Infectious Disease Institute, Makerere University            |
| Melissa A.    | Rolfes           | University of Minnesota                                      |
| Catherine     | Samuel           | University of Stellenbosch                                   |
| Charlotte     | Schutz           | University of Cape Town                                      |
| James         | Scriven          | University of Cape Town                                      |
| Olihile M.    | Sebolai          | University of The Free State                                 |
| Katlego       | Sojane           | University of Kwazulu-natal                                  |
| Charlotte     | Sriruttan        | Ampath                                                       |
| David         | Stead            | University of Cape Town                                      |
| Annica        | Steyn            | Stellenbosch University                                      |
| Narjis K.     | Thawer           | University of Cape Town                                      |
| Friedrich     | Thienemann       | University of Cape Town                                      |

|            |               |                                    |
|------------|---------------|------------------------------------|
| Maximilian | Von Hohenberg | University of Minnesota            |
| Jo-marie   | Vreulink      | University of Stellenbosch         |
| Jeannette  | Wessels       | Nelson Mandela Bay Health District |
| Kathryn    | Wood          | University of Cape Town            |
| Yun-liang  | Yang          | National Chiao Tung University     |
